# Supplementary material
Source: Springer Nature journal article supplement (https://www.springermedizin.de/resource/supplementary/13024_2011_224_MOESM5_ESM.pdf/9643690)

**Vehicle**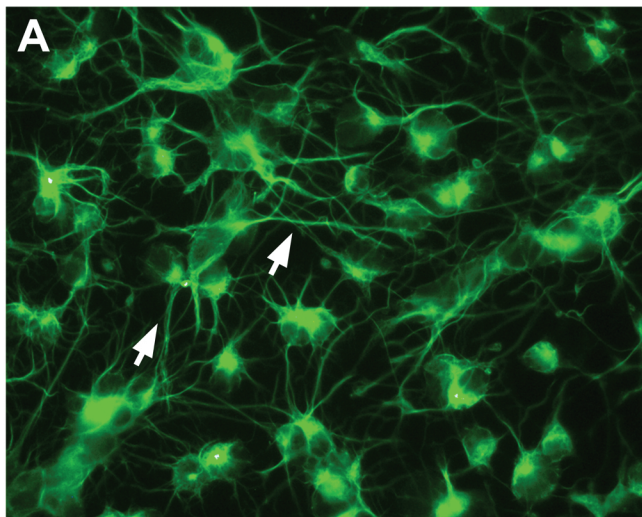**p35**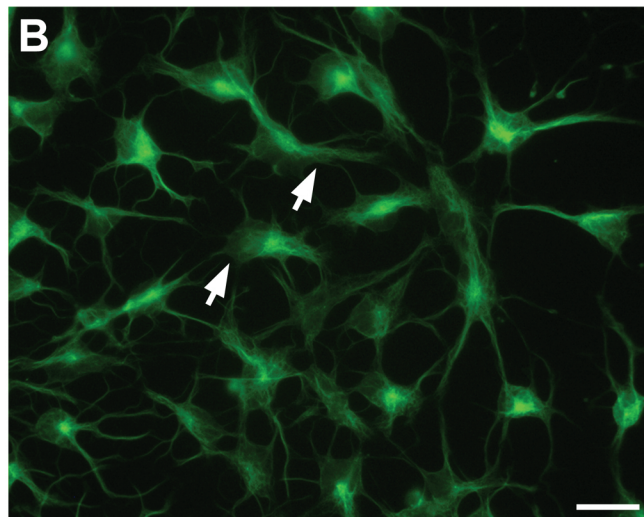**Vehicle**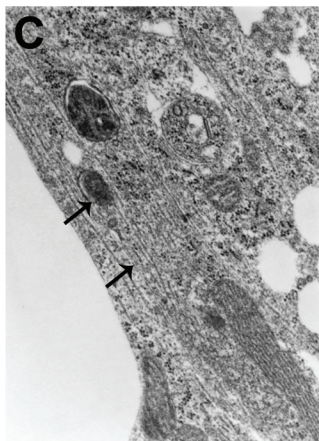**Vehicle**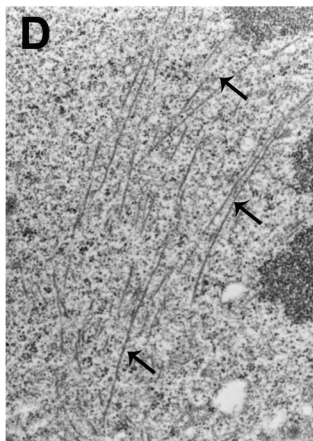**p35**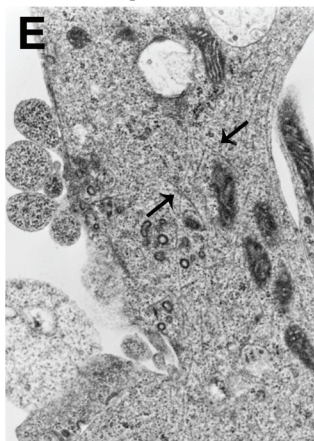**p35**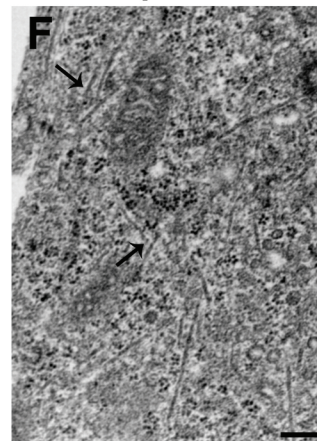

Supplement: MOESM5 [file 9643690]
